# Supplementary material for: Feasibility to use whole-genome sequencing as a sole diagnostic method to detect genomic aberrations in pediatric B-cell acute lymphoblastic leukemia
Source: Front Oncol. 2023 Aug 14;13:1217712. doi: 10.3389/fonc.2023.1217712 (PMC10470829; doi:10.3389/fonc.2023.1217712)
Supplement: Supplementary Table 3 — Genomic findings in samples harboring mandatory aberrations. UPN, unique patient number; HeH, high hyperdiploidy; iAMP (21), intrachromosomal amplification of chromosome 21;KMT2A-r, KMT2A rearrangements; SoC, standard of care; seq[GRCh37], Genome Reference Consortium Human Build 37; UPD, uniparental disomy; CNN-LoH, Copy number neutral- loss of heterozygosity. The karyotype strings derived from chromosome banding analysis and the WGS-revised strings are written following the International Standards for Cytogenetic Nomenclature, ISCN 2022 rules (59). [file Table_3.xlsx]

## Sheet: Supplemetary table 3
UPN	Genetic subgroups	Standard of care karyotype	WGS revised	WGS additional findings
P028	HeH	57,XX,+X,+X,+4,+6,+der(8)t(1;8)(p?;p?), +10,+14,+17,+18,+21,+21	seq[GRCh37] 57,XX,+X,+X,+4,+6, +der(8)t(1;8)(q21.2;p21.3),+10,+14,+17,+18,+21,+21	_
P029	HeH	55,XX,+X,+4,+6,+10,der(11)t(1;11)(q21-22;q23-24), +14,+17,+18,+21,+21	seq[GRCh37] 55,XX,+X,+4,+6,+10, der(11)(t(1;11)(q21.2;q23-24),+14,+17,+18,+21,+21	_
P061	HeH	54,XY,+X,+4,+6,+10,+14,+18,+21	seq[GRCh37] 54,XY,+X,+4,+6,+10,+14,+18,+21	Deletion PAX5 (exon 8) and CNN-LOH 9p(p24.3p13.1)
P062	HeH	54,XX,+X,+X,+4,+8,+9,-13,+14,+14,+21,+21	seq[GRCh37] 54,XX,+X,+X,+4,+8,+9,-13,+14,+14,+21,+21	UPD(3)
P070	HeH	58,XX,dup(1)(q21q44),+4,dup(6)(p25p21), +9,+10,+11,+14,+15,+18,+20,+21,+21,+21,+22	seq[GRCh37] 58,XX,dup(1)(q21q44),+4,dup(6)(p25p21), +9,+10,+11,+14,+15,+18,+20,+21,+21,+21,+22	UPD(7,8,20)
P072	HeH	56,XX,+X,dup(1)(q21q44),+4,+6,+7, +11,+14,+17,+18,+21,+21	seq[GRCh37] 56,XX,+X,dup(1)(q21q44), +4,+6,+7,+11,+14,+17,+18,+21,+21	UPD(22)
P079	HeH	57,XY,dup(1)(q12q44),+4,+6,dup(7)(q11q36), +10,+10,der(13),+14,dup(16)(p?13.3p11.2), +17,+18,+18,+21,+21,+21	seq[GRCh37] 57,XY,dup(1)(q12q44),t(2;14)(p13.3;q32), +4,+6,dup(7)(q11q36),+10,+10,der(13), +14,dup(16)(p?13.3p11.2),+17,+18,+18,+21,+21,+21	IGH::ANXA4
P083	HeH	57,XY,+X,+5,+6,+10,+11,+14,+17,+18,+18,+21,+21	seq[GRCh37] 58,XX,+5,+6,+10,,+10,+11,+14,+17, +18,+18,+21,+21,+21	Deletion IKZF1 (exons 4-7)
P085	HeH	55,XY,+6,+8,+10,+14,+14,+17,+18,+21,+21	seq[GRCh37] 55,XY,+6,+8,+10,+14,+14,+17,+18,+21,+21	_
P092*	HeH	56,XX,+X,+5,+6,+10,+11,+14,+17,+18,+21,+21	seq[GRCh37] 56,XX,+X,+5,+6,+10,+11,+14,+17,+18,+21,+21	Deletion IKZF1 (exons 2-7) and ETV6
P093*	HeH	56,XY,+X,+Y,dup(1)(q12;q43),+4,+6,+10, +14,+17,+18,+21,+21	seq[GRCh37] 56,XY,+X,+X,dup(1)(q12q43)+4,+6,+10,+14, +17,+18,+21,+21	_
P065	t(12;21)	46,XY .nuc ish(ETV6x1,RUNX1x3)(ETV6 con RUNX1x1)[179/200]	seq[GRCh37] 46,XY,t(12;21)(p13;q22)	ETV6::RUNX1
P073	t(12;21)	47,XY,+16, .nuc ish(ETV6x2,RUNX1x3)(ETV6 con RUNX1x1)[187/200]	seq[GRCh37] 47,XY,t(12;21)(p13,q22),+16	Biallelic deletion CDKN2A/B
P074	t(12;21)	57,XY,+4,+5,+6,+7,+10,+12,+17,+19,+20,+21,+22 .nuc ish(ETV6x4,RUNX1x6) (ETV6 con RUNX1x6)(ETV6 con RUNX1x2)[179/200]	seq[GRCh37] 67,XY,+4,+4+5,+5,+6,+6,+7,+7,+10,+10, t(12;21;19)(p13;q22;q22.33),+12,+12,+17,+17, +19,+19,+20,+20,+der21t(12;21),+22,+22	ETV6::RUNX1 and UPD for all disomic chromosomes
P030	t(12;21)	46,XY .nuc ish(ETV6x1,RUNX1x3)(ETV6 con RUNX1x1)[198/200]	seq[GRCh37] 46,XY,t(5;7;12;21;14) (p15;p11;p13;q22;q13), del(12)(p12.1)	ETV6::RUNX1 and deletion IKZF1
P031**	t(12;21)	46,XY,?del(12)(p1?) .nuc ish(ETV6x2,RUNX1x3)(ETV6 con RUNX1x1)[198/200]	seq[GRCh37] 46,XY,t(12;21;12)(p13;q22;q12)	ETV6::RUNX1
P032	t(12;21)	46,XX,?t(11;12;21)(q23;p13;q22)/ 47,idem,t(1;12)(q10;p13),+der(1)t(1;12)(q10;p13) .nuc ish(ETV6x2,RUNX1x3)(ETV6 con RUNX1x1)[176/200]	seq[GRCh37] 46,XX,t(11;12;21;11)(q12;p13.2;q22.12;p11.2)/ 47,idem,t(1;12)(q10;p13),+der(1)t(1;12)(q10;p13)	ETV6::RUNX1
P094*	t(12;21)	47,XY,add(1)(p36.2),del(6)(qq16q27),del(12)(p13p12),+21 .nuc ish(ETV6x2,RUNX1x4)(ETV6 con RUNX1x2)[155/200]	seq[GRCh37] 47,XY,?t(1;6;17)(p34;q16;q21),del(12)(p13p12), t(12;21)(p13;q22),+der(21)t(12;21)	ETV6::RUNX1 and deletion ETV6 (exons 1-14)
P033**	t(1;19)	46,XY,i(9)(q10),der(19)t(1;19)(q23;p13)	seq[GRCh37] 46,XY,i(9)(q10),der(19)t(1;19)(q23;p13)	TCF3::PBX1
P034	t(1;19)	46,XX,der(19)t(1;19)(q23;p13)	seq[GRCh37] 46,XX,der(19)t(1;19)(q23;p13)	TCF3::PBX1 and deletion PAX5 exon 7
P095*	t(1;19)	46,XY,der(19)t(1;19)(q23;p13)	seq[GRCh37] 46,XY,der(19)t(1;19)(q23.3;p13.3)	TCF3::PBX1
P035	iAMP21	47,XY,+X,der(21)qdp(21)(q21q22)	seq[GRCh37] 47,XY,+X, der(21)qdp(21)(21.1q22.3)del(21)(q22.3)	Deletion CDKN2A/B
P036**	iAMP21	46,XY,der(21)qdp(21)(q21.2q22.3)del(21)(q22.3)	seq[GRCh37] 46,XY, der(21)qdp(21)(q21.2q22.3)del(21)(q22.3)	Biallelic deletion CDKN2A/B, deletions RB1, ETV6 and ERG
P075	iAMP21	46,XY,t(8;12)(q24;p13),i(9)(q10),del(16)(q11), qdp(21)(q21q22)	seq[GRCh37] 46,XY,t(8;12)(q24;p13),i(9)(q10), qdp(21)(q21q22)	SLFNL-AS1::ETV6
P081	iAMP21	46,XY,qdp(21)(q21q22)	seq[GRCh37] 46,XY,qdp(21)(q21q22)	Deletions PAX5 (exons 2-6) and ETV6 (exons 2-3)
P096*	iAMP(21)	47,XY,+X,-5,qdp(21)(q21q22.3)del(21)(q22.3),+mar	seq[GRCh37] 47,XY,+X,der(5),del(16)(q22.1), dup(17)(q22),qdp(21)(q21q22.3)del(21)(q22.3)	Deletion IKZF1 (exons 1-3)
P037**	KMT2A-r	46,XY,der(7)t(1;7)(q21.1;q21.3),del(11)(q23.3q24)	seq[GRCh37] 46,XY,der(7)t(1;7)(q21.1;q21.3), del(11)(q23.3q24)	KMT2A::USP2
P039	KMT2A-r	46,XX,t(6;11)(q26-27;q23),der(12)t(12;17)(p11.2;q23)	seq[GRCh37] 46,XX,t(6;11)(q27;q23), der(12)t(12;17)(p11.2;q23)	KMT2A::AFDN
P040	KMT2A-r	46,XX,t(4;11;11)(q2?1;q23;p1?1)/47,idem,+X	seq[GRCh37] 46,XX,t(4;11;11)(q21;q23;p1?),47,idem,+X	KMT2A::AFF1
P066	KMT2A-r	46,XX,t(4;11)(q21;q23)	seq[GRCh37] 46,XX,t(4;11)(q21-q22;q23)	KMT2A::AFF1
P058	KMT2A-r	46,XY,t(10;11)(q25;q23)	seq[GRCh37] 46,XY,t(10;11)(p12.33;q23.3)	KMT2A::MLLT10 and ZCCHC7::PAX5
P076	KMT2A-r	46,XY,t(4;11)(q21;q23)	seq[GRCh37] 46,XY,t(4;11)(q21;q23)	AFF1::KMT2A and deletion CDKN2A/B
P043**	t(9;22)	46,XX,t(9;22)(q34;q11) deletions IKZF1 and ERG?	seq[GRCh37] 46,XX,t(9;22)(q34;q11)	BCR::ABL1 minor, deletions IKZF1 (exons 2-7), CDKN2A/B and PAX5 (exons 6-7),RB1 and BTG
P044	t(9;22)	59,XY,+X,+4,+6,+8,+8,t(9;22)(q34;q11),+10,+10,+11, +18,+21,+21,+der(22)t(9;22),+mar	seq[GRCh37] 59,XY,+X,+der(2),+4,+5,+6,+8,+8, t(9;22)(q34;q11),+10,+10,+11, +18,+21,+der(22)t(9;22)	BCR::ABL1 minor, UPD 14 and 20
P097*	t(9;22)	54,XX,+X,+X,+4,t(9;22)(q34;q11),+10,+14,+21, +21,+der(22)t(9;22)	seq[GRCh37] 54,XX,+X,+X,+4,t(9;22)(q34;q11), +10,+14,+21,+21,+der(22)t(9;22)	BCR::ABL minor
P047	ABL-class#	47,XY,+X.nuc ish(ABL1x3,BCRx2)[127/200]	seq[GRCh37] 47,XY,+X,t(2;9)(q13;q34)	RANBP2::ABL1
P045	ABL-class#	46,XY,t(5;12)(q?3;p13), nuc ish(ETV6x3,RUNX1x2)[172/200]	seq[GRCh37] 46,XY,t(5;12)(q33;p13)	ETV6::PDGFRB, ZCCHC7::PAX5 and deletions IKZF1 (exons 4-7)
P098*	ABL-class	45,XX,del(5)(q32q33),i(7)(q10),der(12;17)(q10;q10)	seq[GRCh37] 45,XX,del(5)(q32q33.3),i(7)(q10), der(12;17)(q10;q10)	EBF1::PDGFRB, deletions IKZF1, ETV6 and PAX5 (exons 2-6)
* validation by BALSAMIC pipeline
** down-Sampling
