# Supplementary material for: Feasibility to use whole-genome sequencing as a sole diagnostic method to detect genomic aberrations in pediatric B-cell acute lymphoblastic leukemia
Source: Front Oncol. 2023 Aug 14;13:1217712. doi: 10.3389/fonc.2023.1217712 (PMC10470829; doi:10.3389/fonc.2023.1217712)
Supplement: Supplementary Table 4 — Summary of SoC and WGS findings in B-other group. UPN, unique patient number; Seq[GRCh37], Genome Reference Consortium Human Build 37; CNN-LoH, Copy number neutral- loss of heterozygosity; PAX5-alt, PAX5 alterations; CRLF2-r, CRLF2 rearrangements; ZFN384-r, ZFN384 rearrangements; IGH-r, IGH rearrangement; DUX4-r, DUX4 rearrangements. The karyotype strings derived from chromosome banding analysis and the WGS-revised strings are written following the International Standards for Cytogenetic Nomenclature, ISCN 2022 rules (59). [file Table_4.xlsx]

## Sheet: Supplementary table4
UPN	Standard of care karyotype	WGS revised	WGS findings	Tentative subgroup/s
P041	46,XX,t(7;15)(p21;q15),add(9)(p22),del(11)(p12)	seq[GRCh37] 46,XX,t(7;15)(p21;q15),add(9)(p22)	UPD14	-
P042	45,XX,dic(9;20)(p11-13;q11)	seq[GRCh37] 45,XX,dic(9;20)(p11-13;q11)	PAX5::NOL4L, P2RY8::CRLF2 and biallelic deletion CDKN2A/B	CRLF2-r/PAX5-alt
P046**	46,XY.nuc ish(TCF3x2)(5'TCF3 sep 3'TCF3x1)[159/200]	seq[GRCh37] 46,XY,t(12;19)(p13.3;p13.3)	TCF3::ZNF384, deletions BTG1 and RB1 (exons18-27)	ZNF384-r
P048	46,XX.nuc ish(TCF3x2)(5'TCF3 sep 3'TCF3x1)[115/200]	seq[GRCh37] 46,XX,t(12;19)(p13.3;p13.3)	TCF3::ZNF384	ZNF384-r
P049	45,XX,der(9;20)(p13.2;p11.2)	seq[GRCh37] 45,XX,der(9;20)(p13.2;p11.2)	PAX5::NOL4L and P2RY8::CRLF2, biallelic deletion CDKN2A/B and deletion IKZF1 (exons 4-7)	CRLF2-r/PAX5-alt
P050	46,XX	seq[GRCh37] 46,XX	Deletion ERG (exons 4-10)	DUX4-r
P051	47,XY,+5,der(7).nuc ish(CDKN2Ax0)[118/200]	seq[GRChr37] 47,XY,+5,der(7)del(7)(p2?)del(7)(q1?), del(9) (21.3p21.3)	Biallelic deletion CDKN2A/B and PAX5 amplification (exons 2-5)	PAX5-alt
P052	47,XY,+der(1)t(1;17)(p36;q21)	seq[GRCh37] 47,XY,+der(1)t(1;17)(p36;q21), t(12;19)(p13.3;p13.3)	TCF3::ZNF384 and PAX5::ZCCHC7	ZNF384-r/PAX5-alt
P053	48,XX,+X,+21.nuc ish(CDKN2Ax0)[170/200]	seq[GRCh37] 48,XX,+X,t(14;20)(q32.33;q13.33+21	P2RY8::CRLF2, biallelic deletion CDKN2A/B and deletion PAX5 (exons 6-7)	CRLF2-r/PAX5-alt
P054	46,XY,der(13)t(X;13)(?;q?)/45,idem, der(7)t(7;16)(q2?;q?),der(9)t(9;16)(p1?2;p?),-16	46,XY,der(13)t(X;13)(?;q?)/45,idem,der(7)t(7;16)(q2?;q?), der(9)t(9;16)(p1?2;p?),-16	Biallelic deletion CDKN2A/B and deletion PAX5	PAX5-alt
P055	48,XY,+der(1)t(1;16)(p11;?),-16,+i(21)(q10)x2	seq[GRCh37] 48,XY,der(1;16)(p10;q10),+i(21)(q10)x2	Deletions IKZF1 (exons 4-8), PAX5 (ex 2-6) and CNN LOH 12q	PAX5-alt
P056	46,XX,del(9)(p1?)[9]	seq[GRCh37] 46,XX,del(9)(p13.3)	Deletions CDKN2A/B and PAX5	PAX5-alt
P057**	46,XX.nuc ish(CDKN2Ax0)[178/200]	seq[GRCh37] 46,X,t(X;14)(p22.33;q32.33),t(4;9)(q32;p21.3)	IGH::CRLF2, KLHL2::MLLT3, biallelic deletion CDKN2A/B, deletions PAX5 and IKZF1 (exons 4-7)	CRLF2-r/PAX5-alt
P060	46,XY,t(10;14)(p11.2-12;q11)	seq[GRCh37] 46,XY,t(10;14)(p12;q11)	P2RY8::CRLF2 and PAX5 amplification (exons 1-5)	CRLF2-r/PAX5-alt
P087	47,XX,+6.nuc ish(CDKN2Ax0)[190/200]	seq[GRCh37] 47,XX,+6,del(9)(p21.3p21.3)	Biallelic deletion CDKN2A/B and CNN LOH 9p	-
P089	46,XX,del(1)(q42q43?),t(16;21)(p11;q22)/ 46,idem, t(5;13)(q31;q21-q22)	seq[GRCh37] 46,XX,del(1)(q42.2q44),t(16;21)(p11;q22)/ 46,idem,t(5;13)(q31;q21-q22)	FUS::ERG	ETV6::RUNX1-like
P090	46,XX,del(16)(q11.2)	seq[GRCh37] 46,XX,del(16)(q11.2)	Deletion CDKN2A/B	-
P091	47,XX+5,t(6;14)(p23;q32),i(9)(q10)	seq[GRCh37] 47,XX+5,t(6;14)(p23;q32.33),i(9)(q10)	IGH::ID4, deletions CDKN2A/B and PAX5	IGH::ID4/PAX5-alt
P099*	45,XY,?dic(4;9)(p?;p13.2),del(14)(q22.1q32.11), der(20)?t(4;20)/45,idem,	seq[GRCh37] 45,XY,dic(9;20)(p13.2;q11.21), t(4;20)(p14;q11.21)	PAX5::NOL4L, APBB2::NOL4L, biallelic deletion CDKN2A/B and deletion IKZF1 (exons 4-8)	PAX5-alt
P100*	46,X,t(X;9)(q21;p13)	seq[GRCh37] 46,X,t(X;9)(p13.2;q21.2)	PAX5::DACH2 and biallelic deletion CDKN2A/B	PAX5-alt
P067**	46,XX,t(12;17)(p13;q21)	seq[GRCh37] 46,XX,del(9)(p21.2p21.3), t(12;17)(p13;q21)	TAF15::ZNF384, biallelic deletion CDKN2A/B and deletion BTG1	ZNF384-r
P069**	46,XY,-9,add(9)(p?),-20,+2mar	seq[GRCh37] 45,XY,t(X;14)(p22.33;q32.33), dic(9;20)(p13.2;q11.2)	PAX5::ZCCHC7, IGH::CRLF2, biallelic deletion CDKN2A/B and deletion IKZF1 (ex 4-8)	CRLF2-r/PAX5-alt
P077**	46,XY	seq[GRCh37] 46,XY,der(14)?t(8;14)(q24.21;q32.33)	IGH-r	DUX4-r
P078	47,XX,+X,der(1)t(1;15)(q21;q?),t(1;15(?;?),t(3;10) (?;?),-5,-10,-13-16,inc	seq[GRCh37] 47,XX,+X, der(1)inv(1)(q22q21.3)t(1;15)(q21.3;q21.1),del(7)(p12p14)	MEF2D::BCL9 and deletion IKZF1	MEF2D-r
P080	nuc ish(CDKN2Ax0,D9Z1x2)[178/200],(ETV6x1,RUNX1x2)[80/100]	seq[GRCh37] 46,XX,del(9)(p13.3p13.1),(9)(p13p24)x2 hmz	Biallelic deletion CDKN2A/B, deletion ETV6 and CNN LOH 9p	-
P086	45,XY,del(1)(p1?1p3?2),t(2;7)(p1?1;p1?1),dic(9;20)(p1?3;q11)	seq[GRCh37] 45,XY,del(1)(p31p13),t(2;7)(p11.2;p12), dic(9;20),del(9)(p?),del(11)(q2?4)	IGK::IKZF1, biallelic deletion CDKN2A/B and deletion PAX5	ETV6::RUNX1-like/ PAX5-alt
P101*	46,XX	46,XX	-	DUX4-r
P059***	47,XY,der(4)t(X;4)(?;p16),+21c	seq[GRCh37] 47,XY,der(4)t(X;4)(q24;p16),+21c	P2RY8::CRLF2 and deletion CDKN2A/B	CRLF2-r
P064***	47,XY,+21c	seq[GRCh37] 47,XY,t(12;14)(p13;q23),+21c	ETV6::HIF1-AS, P2RY8::CRLF2 and deletion IKZF1 (exons 4-8)	CRLF2-r
P071***	47,XY,+21c	seq[GRCh37] 47,XY,+21c	P2RY8::CRLF2 and deletion BTG1	CRLF2-r
	* validation by BALSAMIC pipeline
	** down-Sampling
	*** Down Syndrome ALL
